# Supplementary material
Source: PubMed Central journal article supplement (PMC7450540)
Supplement: NIHMS1614389-supplement-materials_list.pdf [file NIHMS1614389-supplement-materials_list.pdf]

Materials List for:

# Vinyl Chloride and High-Fat Diet as a Model of Environment and Obesity Interaction

Anna L. Lang<sup>1,2</sup>, William T. Goldsmith<sup>3,4</sup>, Regina D. Schnegelberger<sup>5,6</sup>, Gavin E. Arteel<sup>6,7</sup>, Juliane I. Beier<sup>6,7</sup>

<sup>1</sup>Department of Pharmacology and Toxicology, University of Louisville

<sup>2</sup>Hepatobiology and Toxicology Program, University of Louisville

<sup>3</sup>Department of Physiology and Pharmacology, West Virginia University

<sup>4</sup>Center for Inhalation Toxicology, West Virginia University

<sup>5</sup>Department of Pharmacology and Chemical Biology, University of Pittsburgh

<sup>6</sup>Pittsburgh Liver Research Center, University of Pittsburgh

<sup>7</sup>Department of Medicine, Division of Gastroenterology, Hepatology and Nutrition, University of Pittsburgh

Correspondence to: Juliane I. Beier at [jibeier@pitt.edu](mailto:jibeier@pitt.edu)

URL: <https://www.jove.com/video/60351>

DOI: [doi:10.3791/60351](https://doi.org/10.3791/60351)

## Materials

| Name                               | Company                | Catalog Number   | Comments                                                                                                                                                                                                                                                                                      |
|------------------------------------|------------------------|------------------|-----------------------------------------------------------------------------------------------------------------------------------------------------------------------------------------------------------------------------------------------------------------------------------------------|
| ALT/AST reagents                   | Thermo Fisher          | TR70121, TR71121 |                                                                                                                                                                                                                                                                                               |
| C57Bl/6J mice                      | The Jackson Laboratory | 000664           | Animal studies must conform to all relevant ethics and animal welfare regulations and must be reviewed and approved by the appropriate governmental and institutional animal care and use committees. Since this is a chronic study, we recommend using male or female mice 4-6 weeks of age. |
| CO2 Monitor                        | IESt techno            | Ex-Sens          |                                                                                                                                                                                                                                                                                               |
| Eosin                              | Sigma                  | E6003            |                                                                                                                                                                                                                                                                                               |
| Hematoxylin                        | Sigma                  | HHS16            |                                                                                                                                                                                                                                                                                               |
| Inhalation exposure chamber system | IESt techno            | GasExpo          | The inhalation exposure chamber system includes custom software, interface and controller hubs                                                                                                                                                                                                |
| Saturated fat (13%) control diet   | Teklad Diets           | TD.120336        |                                                                                                                                                                                                                                                                                               |
| Saturated fat (42%) diet           | Teklad Diets           | TD.07511         |                                                                                                                                                                                                                                                                                               |
| Sodium citrate                     | Sigma                  | 71497            |                                                                                                                                                                                                                                                                                               |
| Vinyl Chloride                     | MATHESON TRI-GAS       | Series 3590-CGA* | Handle gas with caution                                                                                                                                                                                                                                                                       |
